# Supplementary material for: Preparation of an aptamer based organic–inorganic hybrid monolithic column with gold nanoparticles as an intermediary for the enrichment of proteins
Source: Royal Society of Chemistry journal article supplement (doi:10.1039/c6an00957c), 2016-01-01
Supplement: c6an00957c1.pdf [file c6an00957c1.pdf]

## Electronic Supplementary Information

### Preparation of aptamer based organic-inorganic hybrid monolithic column with gold nanoparticles as intermediary for enrichment of proteins

Jin-cheng Zhao, Qing-yun Zhu, Ling-yu Zhao, Hong-zhen Lian\*, Hong-yuan Chen

*State Key Laboratory of Analytical Chemistry for Life Science, Collaborative Innovation Center of Chemistry for Life Sciences, School of Chemistry & Chemical Engineering and Center of Materials Analysis, Nanjing University, 163 Xianlin Avenue, Nanjing 210023, China*

\*Corresponding authors. Tel.: +86-25-83686075; fax: +86-25-83325180.

E-mail: hzlian@nju.edu.cn (H.Z. Lian)

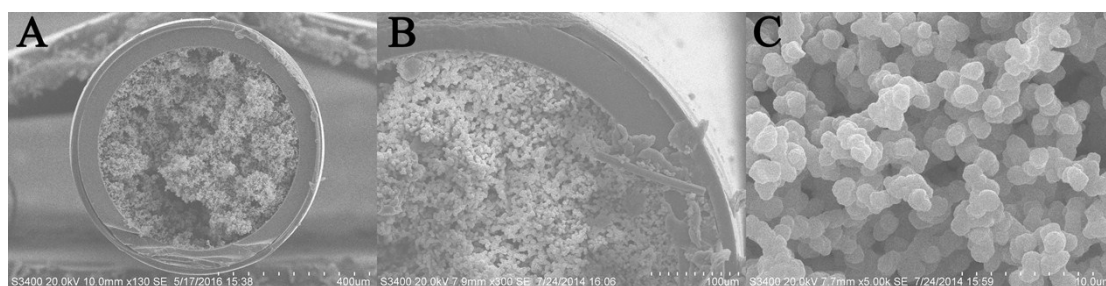

Fig. S-1. SEM images of structure of hybrid monolithic column on the scanning electron microscope ( $\times 130$ ) (A), ( $\times 300$ ) (B) and ( $\times 5000$ ) (C).

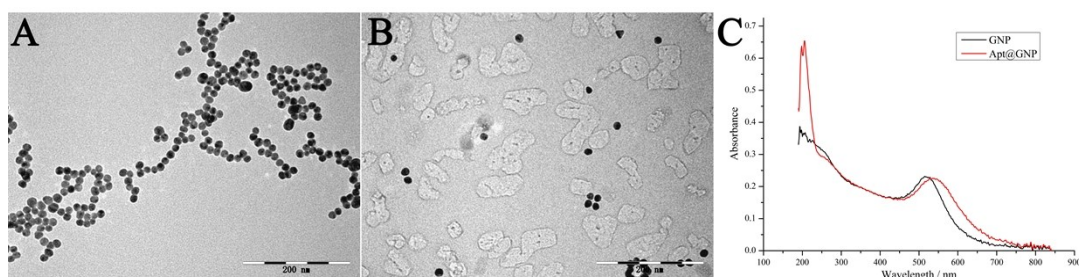

Fig. S-2. TEM images of gold nanoparticles (A) and aptamer modified gold nanoparticles (B); UV-Vis absorbance of gold nanoparticles and aptamer modified gold nanoparticles (C).

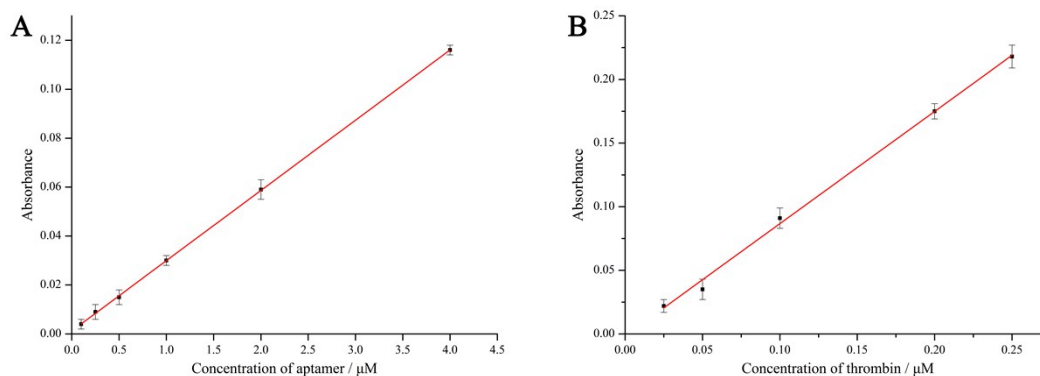

Fig. S-3. The UV-Vis absorbance at 260 nm of aptamer standard solution of different concentrations (A). The UV-Vis absorbance at 405 nm of thrombin standard solution of different concentrations via the enzymatic chromogenic assay (B).

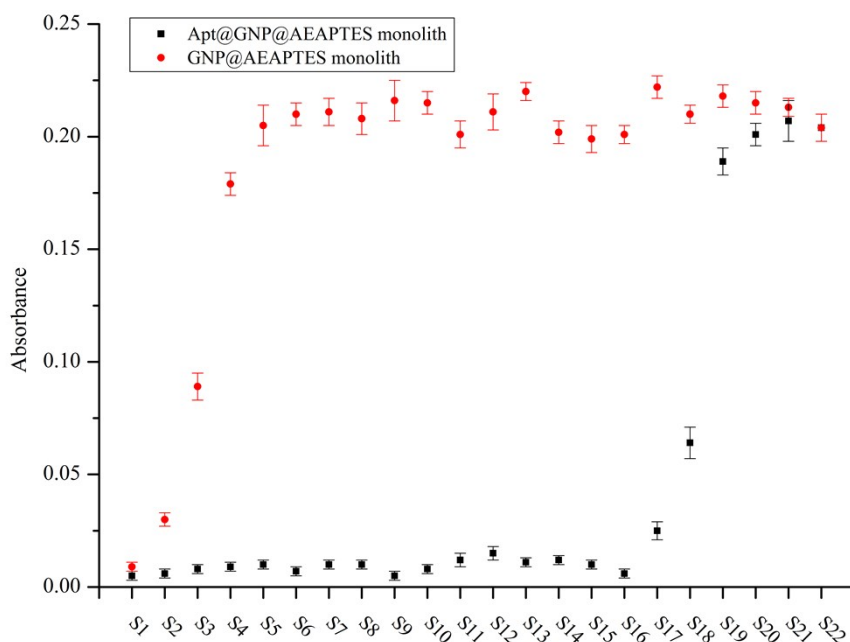

Fig. S-4. The UV-Vis absorbance at 405 nm of all the sample solutions from the effluents (50 μL each) of aptamer@GNP@AEAPTES-silica hybrid monolith and GNP@AEAPTES-silica hybrid monolith via the enzymatic chromogenic assay. Flow rate: 5 μL/min; effective column length: 2 cm.
